# Supplementary figures and images for: Copper phthalocyanine modified SiO2/C electrode as a biomimetic electrocatalyst for 4-aminophenol in the development of an amperometric sensor
Source: Royal Society of Chemistry journal article supplement (doi:10.1039/c5ra18617j), 2015-01-01

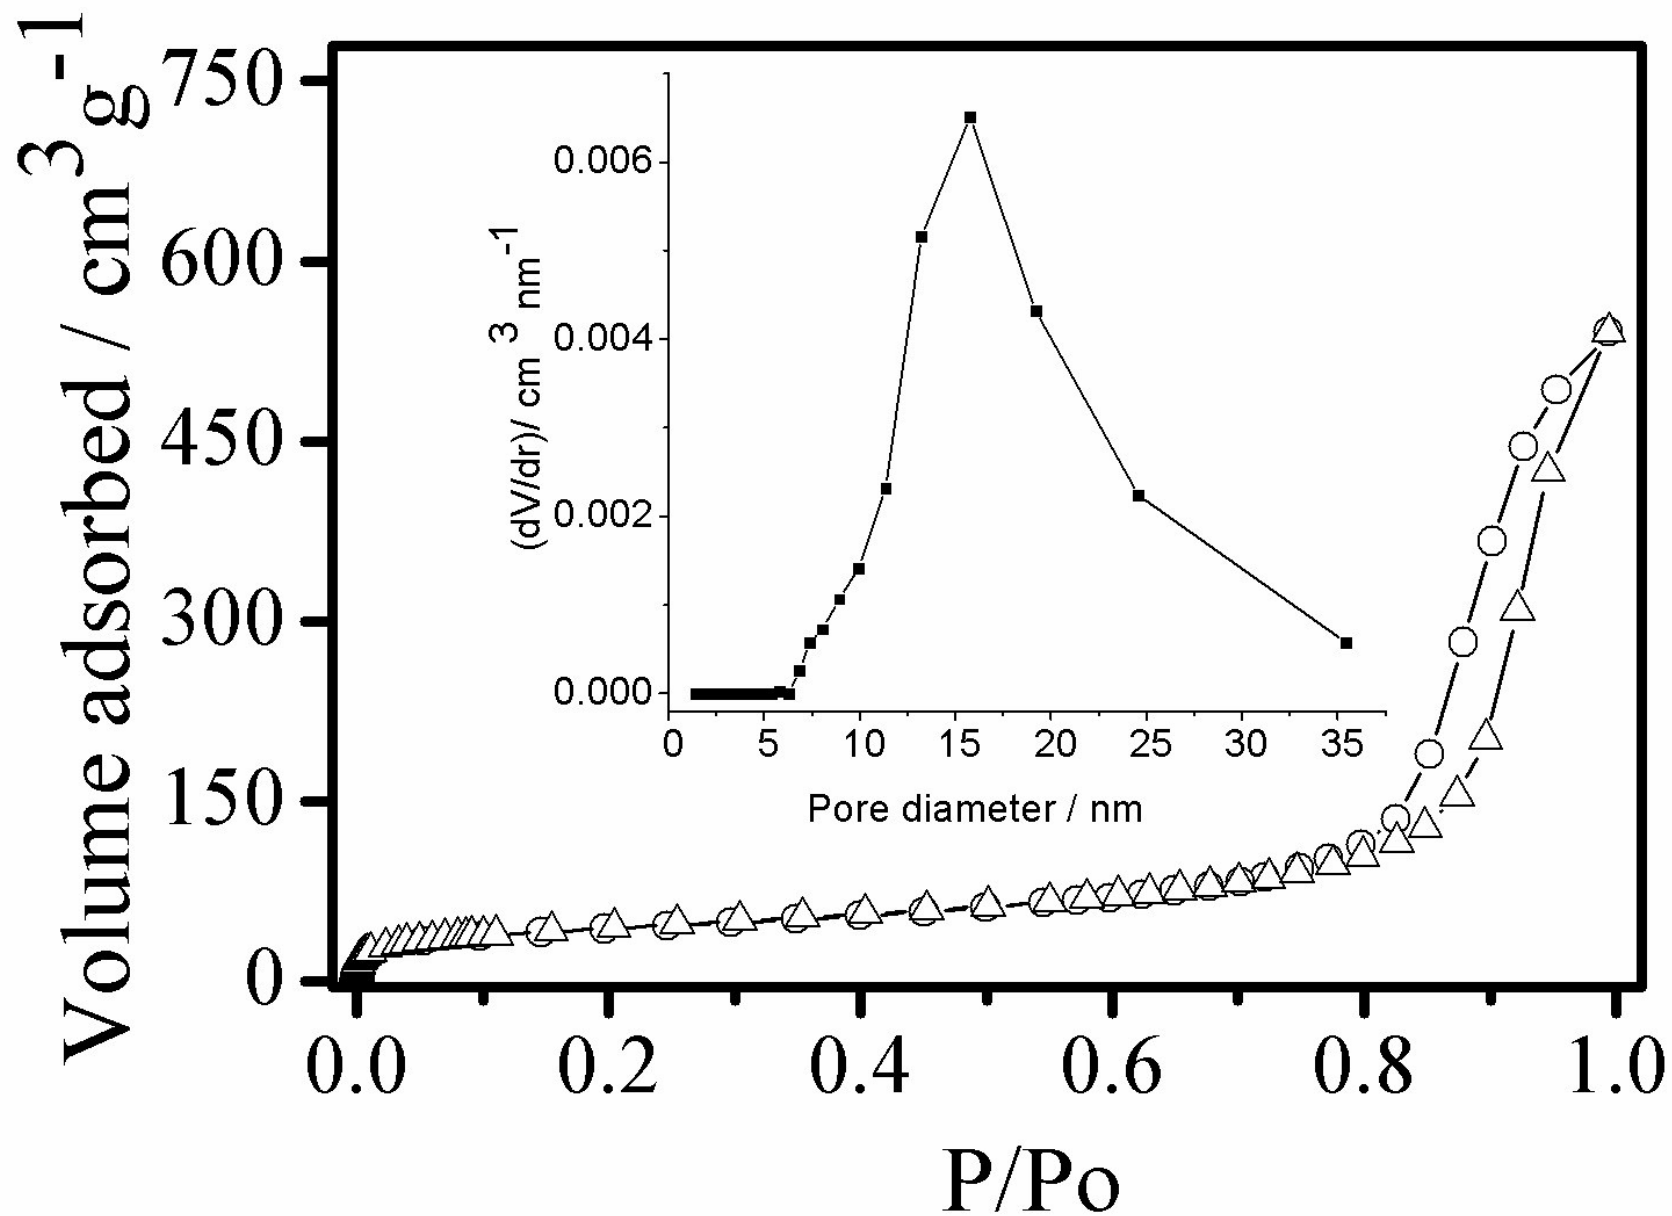

Supplement: c5ra18617j1.pdf [file c5ra18617j1.pdf]
